# Supplementary material for: Betaine–salicylic acid cocrystal for enhanced skincare and acne treatment
Source: Royal Society of Chemistry journal article supplement (doi:10.1039/d5md00001g), 2025-01-01
Supplement: d5md00001g1.pdf [file d5md00001g1.pdf]

## Supporting Information

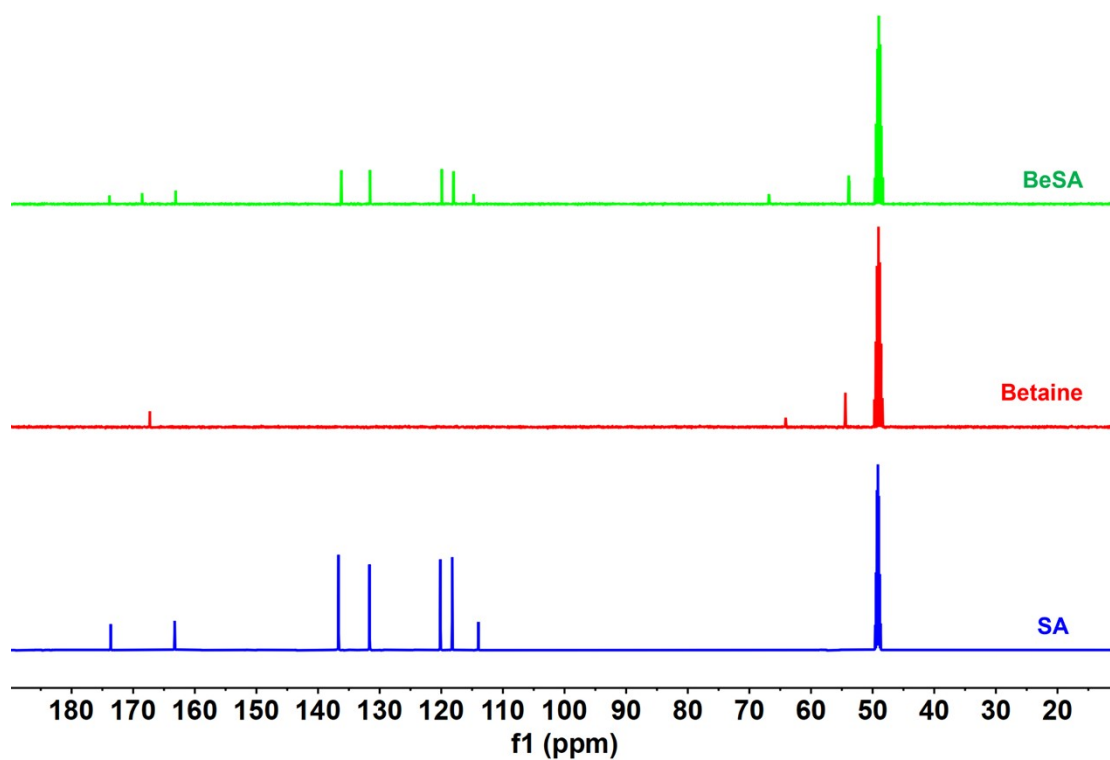

**Figure S1.** <sup>13</sup>C-NMR spectra of BeSA and its precursors.

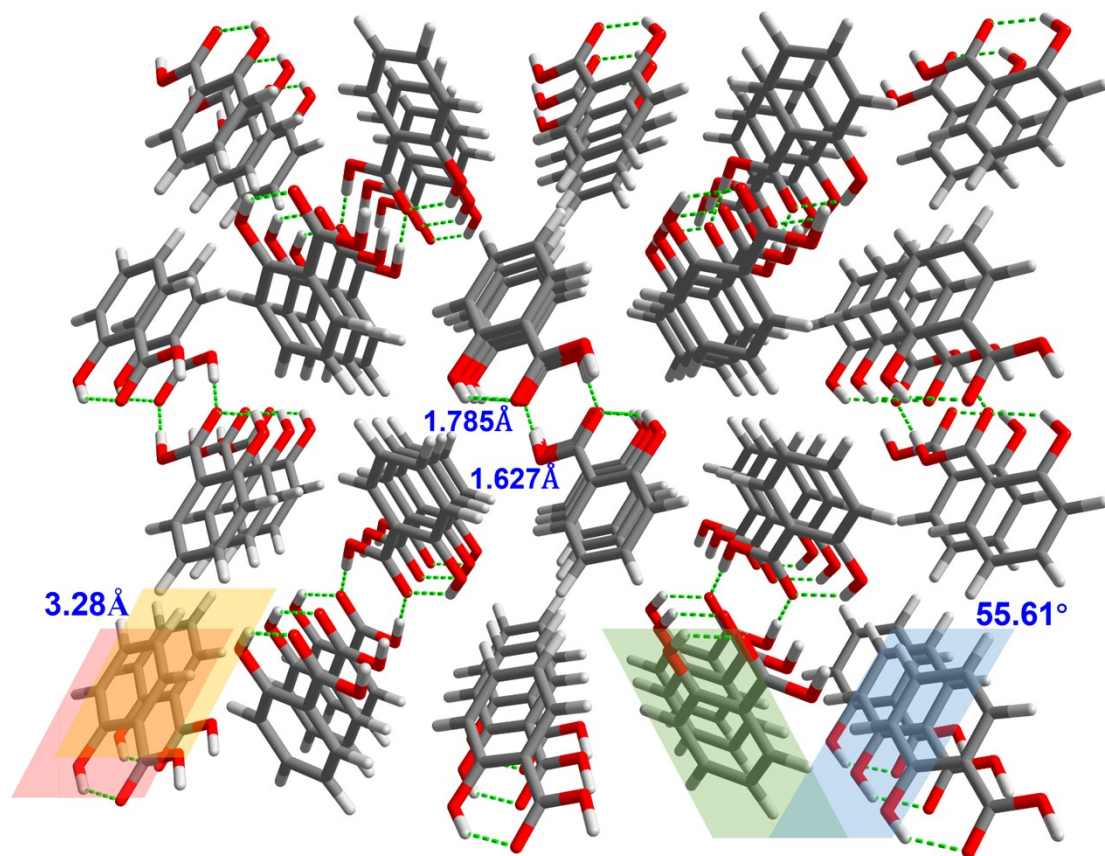

Figure S2. Single-crystal analysis of SA.

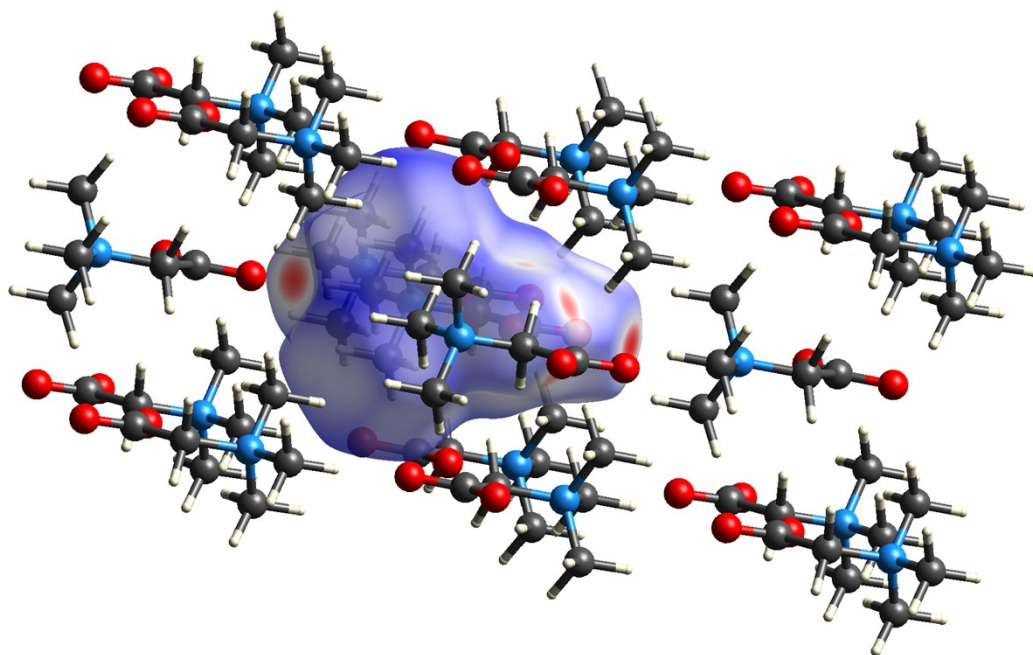

Figure S3. 3D Hirshfeld  $d_{\text{norm}}$  surface of SA.

**Table S1.** Crystal data and structure refinement

| Compound                                    | BeSA                                                          |
|---------------------------------------------|---------------------------------------------------------------|
| CCDC                                        | 2101906                                                       |
| Empirical formula                           | C <sub>12</sub> H <sub>17</sub> NO <sub>5</sub>               |
| Formula weight                              | 255.26                                                        |
| Temperature/K                               | 100.00(10)                                                    |
| Crystal system                              | orthorhombic                                                  |
| Space group                                 | Pbca                                                          |
| a/Å                                         | 10.2107(8)                                                    |
| b/Å                                         | 10.7746(8)                                                    |
| c/Å                                         | 22.5314(17)                                                   |
| α/°                                         | 90                                                            |
| β/°                                         | 90                                                            |
| γ/°                                         | 90                                                            |
| Volume/Å <sup>3</sup>                       | 2478.8(3)                                                     |
| Z                                           | 8                                                             |
| ρ <sub>calc</sub> /cm <sup>3</sup>          | 1.368                                                         |
| μ/mm <sup>-1</sup>                          | 0.107                                                         |
| F(000)                                      | 1088.0                                                        |
| Crystal size/mm <sup>3</sup>                | 0.12 × 0.11 × 0.1                                             |
| Radiation                                   | MoKα (λ = 0.71073)                                            |
| 2θ range for data collection/°              | 5.384 to 59.18                                                |
| Index ranges                                | -14 ≤ h ≤ 13, -14 ≤ k ≤ 14, -29 ≤ l ≤ 30                      |
| Reflections collected                       | 12746                                                         |
| Independent reflections                     | 3120 [R <sub>int</sub> = 0.0466, R <sub>sigma</sub> = 0.0464] |
| Data/restraints/parameters                  | 3120/1/171                                                    |
| Goodness-of-fit on F <sup>2</sup>           | 1.089                                                         |
| Final R indexes [I ≥ 2σ (I)]                | R <sub>1</sub> = 0.0465, wR <sub>2</sub> = 0.0997             |
| Final R indexes [all data]                  | R <sub>1</sub> = 0.0658, wR <sub>2</sub> = 0.1117             |
| Largest diff. peak/hole / e Å <sup>-3</sup> | 0.28/-0.26                                                    |

**Table S2.** Fractional Atomic Coordinates ( $\times 10^4$ ) and Equivalent Isotropic Displacement Parameters ( $\text{\AA}^2 \times 10^3$ ) for BeSA.  $U_{\text{eq}}$  is defined as 1/3 of of the trace of the orthogonalised  $U_{ij}$  tensor.

| <b>Atom</b> | <b>x</b>   | <b>y</b>   | <b>z</b>  | <b>U(eq)</b> |
|-------------|------------|------------|-----------|--------------|
| O2          | 3556.3(10) | 7227.7(10) | 4111.5(5) | 19.6(3)      |
| O4          | 2075.4(10) | 4768.2(9)  | 4572.9(5) | 20.7(3)      |
| O3          | 3821.2(10) | 5241.8(10) | 3858.6(5) | 21.3(3)      |
| O5          | 3254.6(10) | 3664.7(10) | 5232.8(5) | 21.8(3)      |
| O1          | 4799.9(11) | 8944.1(9)  | 3571.7(5) | 23.2(3)      |
| N1          | 838.4(12)  | 2829.3(11) | 5791.5(5) | 15.0(3)      |
| C1          | 4978.3(13) | 6768.5(13) | 3312.9(6) | 15.3(3)      |
| C8          | 2222.1(14) | 4049.8(13) | 5025.4(6) | 17.3(3)      |
| C2          | 5301.4(14) | 8026.4(14) | 3230.8(6) | 17.3(3)      |
| C7          | 4056.2(14) | 6406.6(14) | 3796.7(6) | 16.3(3)      |
| C6          | 5537.3(14) | 5888.2(14) | 2936.2(6) | 18.3(3)      |
| C9          | 884.2(14)  | 3736.4(14) | 5287.2(6) | 17.0(3)      |
| C10         | -574.6(14) | 2699.8(14) | 5964.3(7) | 19.6(3)      |
| C3          | 6180.5(14) | 8363.0(15) | 2783.4(6) | 19.9(3)      |
| C5          | 6392.4(15) | 6222.5(15) | 2489.0(7) | 21.3(3)      |
| C4          | 6718.2(15) | 7468.2(16) | 2419.2(7) | 22.2(3)      |
| C11         | 1573.3(16) | 3301.4(16) | 6316.4(7) | 23.1(4)      |
| C12         | 1337.5(16) | 1586.3(14) | 5599.9(7) | 24.6(4)      |

**Table S3.** Anisotropic Displacement Parameters ( $\text{\AA}^2 \times 10^3$ ) for BeSA. The anisotropic displacement factor exponent takes the form:  $-2\pi^2[h^2a^*U_{11}+2hka^*b^*U_{12}+\dots]$ .

| Atom | $U_{11}$ | $U_{22}$ | $U_{33}$ | $U_{23}$ | $U_{13}$ | $U_{12}$ |
|------|----------|----------|----------|----------|----------|----------|
| O2   | 19.2(5)  | 17.4(6)  | 22.2(6)  | -0.8(5)  | 5.9(4)   | -0.8(4)  |
| O4   | 22.3(6)  | 17.1(5)  | 22.7(5)  | 3.6(5)   | 2.9(5)   | -1.5(4)  |
| O3   | 22.8(6)  | 16.1(6)  | 25.1(6)  | 1.8(5)   | 6.3(5)   | -1.3(4)  |
| O5   | 15.5(5)  | 25.8(6)  | 24.0(6)  | 0.2(5)   | 0.0(4)   | -0.4(4)  |
| O1   | 26.0(6)  | 17.0(6)  | 26.7(6)  | 0.8(5)   | 10.0(5)  | -1.0(5)  |
| N1   | 15.7(6)  | 14.4(6)  | 14.9(6)  | 0.4(5)   | 0.0(5)   | 1.1(5)   |
| C1   | 13.1(7)  | 18.3(7)  | 14.6(7)  | 0.9(6)   | -3.1(6)  | -0.8(6)  |
| C8   | 19.3(7)  | 14.4(7)  | 18.3(7)  | -3.4(6)  | 1.1(6)   | -1.7(6)  |
| C2   | 15.3(7)  | 18.7(7)  | 17.9(7)  | 1.3(6)   | -2.2(6)  | 1.8(6)   |
| C7   | 13.8(7)  | 17.5(7)  | 17.6(7)  | 0.8(6)   | -2.6(6)  | 0.9(6)   |
| C6   | 17.9(7)  | 20.1(8)  | 16.9(7)  | -0.5(6)  | -4.5(6)  | 0.6(6)   |
| C9   | 16.5(7)  | 17.5(7)  | 16.9(7)  | 2.4(6)   | -1.5(6)  | 0.4(6)   |
| C10  | 16.4(7)  | 22.0(8)  | 20.4(7)  | 1.1(6)   | 3.3(6)   | -2.6(6)  |
| C3   | 18.0(7)  | 21.7(8)  | 20.0(8)  | 6.9(7)   | -2.8(6)  | -1.5(6)  |
| C5   | 18.7(7)  | 28.7(9)  | 16.5(7)  | -2.2(7)  | -2.7(6)  | 5.0(6)   |
| C4   | 15.9(7)  | 35.5(9)  | 15.1(7)  | 5.3(7)   | 0.9(6)   | 1.8(7)   |
| C11  | 21.4(8)  | 30.3(9)  | 17.7(7)  | -1.9(7)  | -5.2(6)  | 1.3(7)   |
| C12  | 30.3(9)  | 15.1(8)  | 28.3(8)  | 0.4(7)   | 9.6(7)   | 3.6(6)   |

**Table S4.** Bond Lengths for BeSA.

| Atom | Atom | Length/ $\text{\AA}$ | Atom | Atom | Length/ $\text{\AA}$ |
|------|------|----------------------|------|------|----------------------|
| O2   | C7   | 1.2436(17)           | C1   | C2   | 1.407(2)             |
| O4   | C8   | 1.2888(18)           | C1   | C7   | 1.492(2)             |
| O3   | C7   | 1.2853(18)           | C1   | C6   | 1.395(2)             |
| O5   | C8   | 1.2255(17)           | C8   | C9   | 1.526(2)             |
| O1   | C2   | 1.3528(18)           | C2   | C3   | 1.398(2)             |
| N1   | C9   | 1.4996(18)           | C6   | C5   | 1.381(2)             |
| N1   | C10  | 1.5009(19)           | C3   | C4   | 1.380(2)             |
| N1   | C11  | 1.4902(19)           | C5   | C4   | 1.392(2)             |
| N1   | C12  | 1.4966(18)           |      |      |                      |

**Table S5.** Bond Angles for BeSA.

| Atom | Atom | Atom | Angle/°    | Atom | Atom | Atom | Angle/°    |
|------|------|------|------------|------|------|------|------------|
| C9   | N1   | C10  | 106.69(11) | O1   | C2   | C1   | 122.73(13) |
| C11  | N1   | C9   | 111.30(12) | O1   | C2   | C3   | 117.58(13) |
| C11  | N1   | C10  | 108.05(11) | C3   | C2   | C1   | 119.69(14) |
| C11  | N1   | C12  | 111.29(12) | O2   | C7   | O3   | 123.79(13) |
| C12  | N1   | C9   | 110.73(11) | O2   | C7   | C1   | 119.32(13) |
| C12  | N1   | C10  | 108.60(11) | O3   | C7   | C1   | 116.88(13) |
| C2   | C1   | C7   | 119.71(13) | C5   | C6   | C1   | 121.69(14) |
| C6   | C1   | C2   | 118.63(13) | N1   | C9   | C8   | 117.72(12) |
| C6   | C1   | C7   | 121.67(13) | C4   | C3   | C2   | 120.20(15) |
| O4   | C8   | C9   | 109.55(12) | C6   | C5   | C4   | 119.02(15) |
| O5   | C8   | O4   | 127.22(14) | C3   | C4   | C5   | 120.77(14) |
| O5   | C8   | C9   | 123.23(13) |      |      |      |            |

**Table S6.** Hydrogen Bonds for BeSA.

| D  | H  | A  | d(D-H)/Å | d(H-A)/Å | d(D-A)/Å | D-H-A/° |
|----|----|----|----------|----------|----------|---------|
| O3 | H4 | O4 | 0.94     | 1.53     | 2.455(3) | 170.9   |
| O1 | H1 | O4 | 0.82     | 2.52     | 3.089(3) | 128.0   |
| O1 | H1 | O2 | 0.82     | 1.83     | 2.552(3) | 146.2   |

**Table S7.** Torsion Angles for BeSA.

| A  | B  | C  | D  | Angle/°     | A   | B  | C  | D  | Angle/°     |
|----|----|----|----|-------------|-----|----|----|----|-------------|
| O1 | C2 | C3 | C4 | -179.63(13) | C6  | C1 | C7 | O2 | -178.17(13) |
| C1 | C2 | C3 | C4 | 0.7(2)      | C6  | C1 | C7 | O3 | 1.4(2)      |
| C2 | C1 | C6 | C5 | 0.0(2)      | C7  | C1 | C2 | O1 | -0.6(2)     |
| C2 | C1 | C7 | O2 | 2.0(2)      | C7  | C1 | C2 | C3 | 179.04(13)  |
| C2 | C1 | C7 | O3 | -178.46(13) | C7  | C1 | C6 | C5 | -179.90(13) |
| C2 | C3 | C4 | C5 | 0.3(2)      | O4  | C8 | C9 | N1 | 175.48(12)  |
| C3 | C4 | C5 | C6 | -1.2(2)     | O5  | C8 | C9 | N1 | -5.2(2)     |
| C4 | C5 | C6 | C1 | 1.0(2)      | C10 | N1 | C9 | C8 | 179.57(12)  |
| C6 | C1 | C2 | O1 | 179.52(13)  | C11 | N1 | C9 | C8 | 61.94(16)   |
| C6 | C1 | C2 | C3 | -0.8(2)     | C12 | N1 | C9 | C8 | -62.44(16)  |

**Table S8.** Hydrogen Atom Coordinates ( $\text{\AA}\times 10^4$ ) and Isotropic Displacement Parameters ( $\text{\AA}^2\times 10^3$ ) for BeSA.

| <b>Atom</b> | <b><i>x</i></b> | <b><i>y</i></b> | <b><i>z</i></b> | <b>U(eq)</b> |
|-------------|-----------------|-----------------|-----------------|--------------|
| H1          | 4306.18         | 8644.7          | 3820.54         | 35           |
| H6          | 5328.97         | 5054.86         | 2987.58         | 22           |
| H9A         | 485.92          | 4504.21         | 5421.12         | 20           |
| H9B         | 340.43          | 3413.4          | 4969.75         | 20           |
| H10A        | -900.12         | 3486.17         | 6099.91         | 29           |
| H10B        | -653.28         | 2098.55         | 6276.72         | 29           |
| H10C        | -1074.29        | 2431.99         | 5626.9          | 29           |
| H3          | 6403.77         | 9192.65         | 2730.95         | 24           |
| H5          | 6745.11         | 5624.09         | 2238.15         | 26           |
| H4A         | 7305.18         | 7700.18         | 2123.74         | 27           |
| H11A        | 2487.3          | 3359.93         | 6220.53         | 35           |
| H11B        | 1458.03         | 2741.49         | 6643.69         | 35           |
| H11C        | 1248.06         | 4107.03         | 6423.18         | 35           |
| H12A        | 833.01          | 1296.08         | 5268.18         | 37           |
| H12B        | 1259.15         | 1008.7          | 5922.34         | 37           |
| H12C        | 2240.54         | 1656.7          | 5486.12         | 37           |
| H4          | 3220(20)        | 5050(30)        | 4159(10)        | 86(9)        |

**Table S9.** Hydrogen bonds between SA and TIR

| <b>Donor</b> | <b>Donor</b> | <b>Acceptor</b> |
|--------------|--------------|-----------------|
| Gln636 NE2   | Gln636 1HE2  | SYS O0A         |
| Lys677 NZ    | Lys677 HZ1   | SYS O07         |
| Lys677 NZ    | Lys677 HZ1   | SYS O08         |
| Lys689 NZ    | Lys689 HZ1   | SYS O07         |
| Lys689 NZ    | Lys689 HZ1   | SYS O08         |
| Lys689 NZ    | Lys689 HZ1   | SYS O0A         |

**Table S10.** Hydrogen bonds between BeSA and TIR

| <b>Donor</b> | <b>Donor</b> | <b>Acceptor</b> |
|--------------|--------------|-----------------|
| Gln636 NE2   | Gln636 1HE2  | SYS O0A         |
| Asn672 ND2   | Asn672 1HD1  | SYS O07         |
| Asn672 ND2   | Asn672 1HD1  | SYS O08         |
| Lys677 NZ    | Lys677 HZ1   | TCJ O06         |
| Lys677 NZ    | Lys677 HZ1   | TCJ O07         |
| Thr685 OG1   | Thr685 HG1   | TCJ O06         |
| Thr685 OG1   | Thr685 HG1   | TCJ O07         |

**Table S11.** Enclosed skin patch tests on 31 volunteers

| Group | Time<br>(h) | Number of volunteers with different irritation scores |   |   |   |   |
|-------|-------------|-------------------------------------------------------|---|---|---|---|
|       |             | 0                                                     | 1 | 2 | 3 | 4 |
| SA    | 0.5         | 31                                                    | 0 | 0 | 0 | 0 |
|       | 24          | 31                                                    | 0 | 0 | 0 | 0 |
|       | 48          | 31                                                    | 0 | 0 | 0 | 0 |
| BeSA  | 0.5         | 31                                                    | 0 | 0 | 0 | 0 |
|       | 24          | 31                                                    | 0 | 0 | 0 | 0 |
|       | 48          | 31                                                    | 0 | 0 | 0 | 0 |
